# Supplementary material for: An evaluation of COVID-19 serological assays informs future diagnostics and exposure assessment
Source: PubMed Central journal article supplement (PMC7338506; doi:10.1038/s41467-020-17317-y), 2020-07-06
Supplement: 41467_2020_17317_MOESM1_ESM.pdf [file 41467_2020_17317_MOESM1_ESM.pdf]

Editorial Note:

This manuscript has been previously reviewed at another journal that is not operating a transparent peer review scheme. The manuscript was considered suitable for publication without further review at *Nature Communications*.
