# Supplementary material for: An evaluation of COVID-19 serological assays informs future diagnostics and exposure assessment
Source: PubMed Central journal article supplement (PMC7338506; doi:10.1038/s41467-020-17317-y), 2020-07-06
Supplement: 41467_2020_17317_MOESM3_ESM.pdf [file 41467_2020_17317_MOESM3_ESM.pdf]

### **Description of Additional Supplementary Files**

File Name: Supplementary Data 1

Description: Rough data of the serological laboratory assays are depicted as OD ratio (Wantai and Euroimmun), Arbitrary Units/ml (Liaison) and PRNT titer (PRNT50). The rapid tests are depicted as positive or negative.
